# Supplementary material for: Beyond GRACE: Evaluating the benefits of NGGM and MAGIC for precipitation estimation over Europe
Source: Copernicus journal article supplement (doi:10.5194/egusphere-2025-3659), 2025-10-17
Supplement: Supplementary file [file egusphere-2025-3659-AC1-supplement.pdf]

# **Beyond GRACE: Evaluating the benefits of NGGM and MAGIC for precipitation estimation over Europe.**

**Author(s): Muhammad Usman Liaqat et al.**

**MS No.: egusphere-2025-3659**

## **Reviewer 1**

### **General Response**

We would like to thank the reviewer for the careful evaluation of our manuscript and for the productive comments, which have helped us to improve the quality of the study. A detailed response to each comment is provided below. For clarity, the reviewers' comments (RC1) are reported in light blue, while the author's responses (ACs) are presented in black. The text that will be added or revised in the manuscript is highlighted in red to clearly indicate the changes made to address the reviewers' comments. All suggested revisions will be incorporated in the revised manuscript submitted after the discussion phase.

RC1: The use of ERA5-Land both to construct TWS (input) and as precipitation reference risks circularity. Validate against independent gauges/radar (ECA&D, national networks) or multi-product references (GPCC, MSWEP, IMERG) over representative regions/seasons.

ACs: We appreciate the reviewer's insightful comment about the possible circularity in using ERA5L both to (i) construct TWS used as input to SM2RAIN and (ii) serve as reference precipitation. We completely agree that, for an operational validation, independent precipitation datasets such as ECA&D, GPCC, MSWEP, or IMERG would be necessary to avoid relying on a single data source.

However, this study is not intended as an operational validation of a new precipitation product. Instead, it is designed as a controlled, synthetic experiment to evaluate how different future gravity mission configurations (NGGM and MAGIC) affect the sensitivity and performance of precipitation estimation. In this context, ERA5L serves as a self-consistent "proxy truth," providing physically coherent TWS and precipitation data. This setup allows us to:

- Focus on how temporal resolution and measurement errors influence results, without complications from inconsistencies between independent datasets.
- Ensure physical consistency between TWS variations and corresponding precipitation, which is crucial when assessing SM2RAIN's ability to infer rainfall from TWS for the first time.
- Create a synthetic environment in which differences between configurations (e.g., 5-day vs. 30-day temporal resolution,  $\pm$  error levels) can be compared fairly.

Consequently, our results should be interpreted as relative assessments of sensitivity rather than absolute validation of metrics. The main objective is to understand the expected gains in precipitation estimation if future missions like NGGM or MAGIC meet their target accuracy and sampling goals, not to validate an existing precipitation dataset. Moreover, we will revise Section 2.4 and add a new subsection, "Limitations and Future Work," in the revised manuscript as well below, which explains the purpose of the synthetic experiments and outlines our plans for future validation using independent observational datasets (e.g., ECA&D, GPCC, MSWEP, IMERG).

### **"Limitations and Future Work"**

This study conducts a controlled sensitivity experiment utilizing ERA5L as a self-consistent synthetic reference framework; hence, the results reflect relative performance assessment rather than independent validation against in situ observations. Importantly, these experiments therefore provide a first, controlled synthetic assessment of the feasibility of retrieving precipitation from TWS. The added value of our study is not to validate the SM2RAIN

algorithm (which has been done extensively using multiple observational precipitation datasets such as (e.g., GPCC or E-OBS) but rather to assess its sensitivity to the sampling and accuracy expected from future gravity missions. Further, the SM2RAIN framework does not show evapotranspiration as independent fluxes, which could affect how storage dynamics change over weeks. Neglecting evaporation can lead to biased precipitation estimates, particularly in warm, vegetated, and semiarid regions where evapotranspiration is significant. The SM2RAIN parameterization is also expected to be improved by using machine learning approaches. Machine learning can be used to learn how the SM2RAIN parameters depend on TWS dynamics, climate indicators, and land surface characteristics. This preserves the physical SM2RAIN structure while reducing calibration dependency, improving spatial coherence, and enhancing robustness in data scarce and nonstationary environments. Finally, TWS changes generally include contributions from groundwater, but the current framework does not make a clear distinction between groundwater storage and other hydrological components. Future work will address these issues by integrating flux-consistent water balance constraints (incorporating evapotranspiration), parameter estimation using machine learning and process based ground water depletion attribution with future gravity missions.

**RC1:** The intro motivates higher cadence gravity but doesn't cleanly state why replacing SM with TWS is the key scientific gap. Explicitly articulate why it is expected to improve SM2RAIN (e.g., deeper storage sensitivity).

**ACs:** We thank the reviewer for the comment, and we will revise the introduction to clarify why replacing surface soil moisture with terrestrial water storage represents the central scientific gap addressed in this study. The explanation is also provided below:

Gravimetry observes terrestrial water storage integrating water variations over the full soil column and shallow subsurface. This makes it less sensitive to surface saturation and vegetation impacts. The ability to identify precipitation in gravimetric observations is directly related to the uncertainty of the measurements. As precipitation represents the primary source of terrestrial water storage, variations in TWS inherently reflect cumulative water inputs and losses at larger spatial scales (Zhong et al., 2025). These characteristics make TWS a suitable choice, potentially better than surface soil moisture, for estimating accumulated precipitation at sub monthly scales. But this prospect hasn't been looked into yet because GRACE and GRACE FO only give monthly TWS observations with significant uncertainty. The next NGGM and MAGIC missions are projected to improve accuracy and temporal resolution, which makes this expansion of SM2RAIN possible for the first time. We will revise the introduction accordingly to explicitly state that the novelty of this work lies in exploiting terrestrial water storage rather than surface soil moisture and to clarify the expected benefits in terms of precipitation detectability, robustness under vegetation and frozen conditions and sensitivity to large rainfall events. This clarification strengthens the scientific motivation of the study and better positions it within the context of future gravity mission applications.

**RC1:** Methods resample inputs to 100 km using bilinear interpolation while the resolution of GRACE km and NGGM/MAGIC are lower. Conduct a sensitivity analysis to motivate your selection.

**ACs:** We thank the reviewer for raising this important point regarding the choice of spatial resolution and the potential mismatch with the native resolution of GRACE and future NGGM/MAGIC gravity missions. Our objective is not to imply that gravity missions resolve hydrological processes at 100 km spatial scales. Rather, the 100 km grid is adopted as a common analysis grid that facilitates the application of the SM2RAIN framework and enables a consistent comparison across synthetic mission configurations while preserving the large-scale information content relevant for gravimetric observations. To support this choice, we conducted a set of scale-consistency and sensitivity analyses, which are now provided below in Fig. 1. The results in Fig. 1 show the spatial distribution of correlation coefficients ( $R$ ) between ERA5-Land-derived TWS and GRACE TWS over Europe. The left panel shows correlations computed over the extended ERA5-Land period (2002–2022), while the right panel is restricted to the common GRACE observation period (2002–2015). Median correlation values increase from 0.66 to 0.79 when restricting the analysis to the overlapping period, indicating strong consistency between ERA5-Land and GRACE at large spatial scales.

Higher correlations are observed across central and southern Europe, confirming that ERA5-Land captures gravity-relevant TWS variability when viewed at appropriate scales.

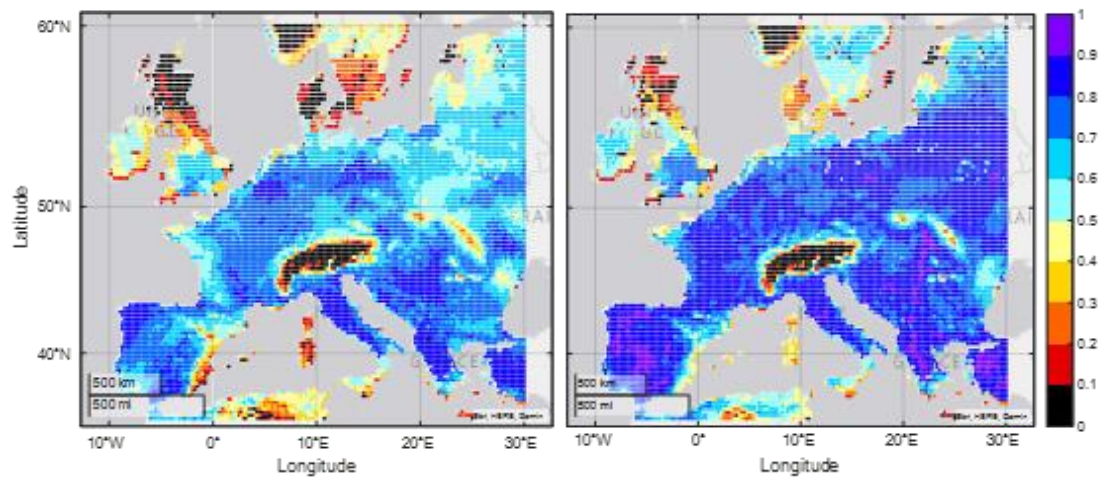

Figure 1. Spatial correlation between ERA5-Land TWS and GRACE TWS. Left panel shows correlations computed over the extended ERA5-Land period (2002–2022), while the right panel is restricted to the common GRACE observation period (2002–2015).

Additionally, Fig. 2 shows the comparison of TWS variability derived from ERA5-Land, ESM, and GRACE over Europe, illustrating the consistency of large scale signals across datasets with different native spatial resolutions. Panels include (i) spatial correlations between ERA5-Land TWS and GRACE TWS over different analysis periods and (ii) correlation maps between model-derived TWS (ESM and ERA5-Land) and GRACE solutions from two independent processing centers (CSR and JPL). Despite differences in native resolution and processing approaches, ERA5-Land and ESM exhibit coherent large-scale TWS patterns that closely match GRACE observations, with spatially consistent correlations approximately ( $R = 0.8$ ) across large parts of Europe and across both GRACE solutions. Fine-scale variability present in model-based products is largely smoothed in GRACE, confirming that gravity-observable TWS signals are dominated by large-scale spatial variability.

These results demonstrate that resampling a common analysis grid preserves gravity relevant information and does not introduce artificial small-scale signals, supporting the methodological choice adopted in the synthetic experiments. Hence, these analyses demonstrate that the dominant terrestrial water storage (TWS) signals relevant for gravity missions are governed by large scale spatial variability, rather than by small scale features introduced through interpolation. We will clarify this rationale in the methods section of the revised manuscript and will add the corresponding analyses to the supplementary material. The main conclusions of the study are robust with respect to the chosen spatial resolution and should be interpreted as relative sensitivity assessments of future gravity mission configurations, rather than as claims about the native resolving power of NGGM or MAGIC.

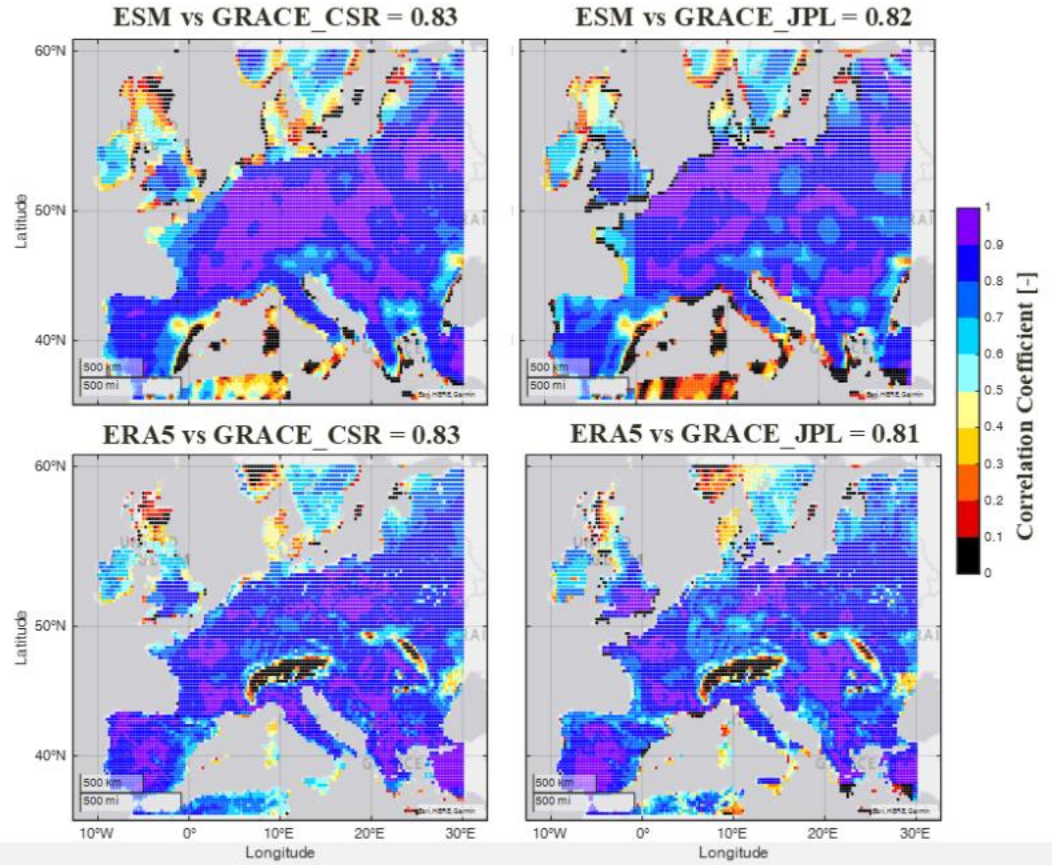

Figure 2. Scale consistency between model-derived and gravimetric terrestrial water storage over Europe.

RC1: Nash-Sutcliffe is mentioned but never reported. It is suggested to include it.

**Authors:** In this study, the Nash–Sutcliffe efficiency (NS) index is used as the objective function during the calibration of the SM2RAIN model parameters, while bias, R, and RMSE are used for performance evaluation. This is in line with, e.g., Knoben et al., 2019; Williams, 2025), who suggest using skill metrics only for calibration. The correction will be incorporated by ensuring consistency in the description of performance metrics throughout the revised manuscript text.

RC1: Specify calibration design (parameter bounds, train/validation split, spatial cross-validation).

**ACs:** Calibration is performed independently at each grid cell (point-by-point) using a gradient-based optimization function. The procedure estimates five parameters:  $Z$ ,  $a$ ,  $b$ ,  $T_{pot}$ , and  $T_{base}$ . The parameter  $Z$  represents the total water storage capacity (denoted as  $Z^*$  in the manuscript), while  $a$  and  $b$  control the drainage formulation. The parameters  $T_{base}$  and  $T_{pot}$  regulate the adaptive exponential filtering applied to the TWS signal prior to inversion. The parameter bounds are as follows:  $Z^*$  ranges between 10 and 1200,  $a$  between 0 and 160,  $b$  between 1 and 50,  $T_{pot}$  between 0.05 and 0.75, and  $T_{base}$  between 0.05 and 3.0. Optimization is carried out using MATLAB's `fmincon` function with the active set algorithm, allowing a maximum of 300 iterations and 500 function evaluations. This calibration is performed by comparing simulated precipitation with reference data (e.g., ERA5-Land) and minimizing an objective function based on the Nash–Sutcliffe efficiency (NS, Nash and Sutcliffe, 1970). This will be included in the revised section 2.3.

Regarding the validation strategy, the current implementation uses the full available time series at each grid cell for both calibration and performance assessment. An explicit temporal train/validation split or spatial cross-validation was not applied. This design choice is consistent with the primary objective of the study, which is to conduct a controlled synthetic sensitivity assessment of precipitation retrieval performance under different NGGM/MAGIC sampling and error scenarios, rather than to provide operational out-of-sample validation of a precipitation product. These implementation details will be added by the end of method section 2.3. Future work will explore independent validation strategies, including temporal holdout and spatial cross-validation.

RC1: Add some statistics for the calibrated parameters  $a$ ,  $b$  and  $Z$  and discuss how they differentiate from the SM2RAIN other applications.

ACs: The spatial distributions of the calibrated SM2RAIN parameters are summarized in Table 1. The storage capacity parameter “ $Z^*$ ” ranges from 38.85 to 1008.70, with a median value of 506.80 and an interquartile range (IQR) of 432.67–584.10. These values are substantially larger than those typically reported for surface soil moisture based SM2RAIN applications, reflecting the deeper and more integrated nature of terrestrial water storage signals derived from gravimetry.

**Table 1.** Summary statistics of calibrated SM2RAIN parameters across all grid cells. Q1 and Q3 denote the first and third quartiles of the dataset, respectively. IQR represents the interquartile range ( $Q3 - Q1$ ) while Min and Max indicate the minimum and maximum values

| Parameter  | Min   | Q1     | Median | Q3    | IQR    | Max    |
|------------|-------|--------|--------|-------|--------|--------|
| $Z^*$      | 38.85 | 432.67 | 506.8  | 584.1 | 151.43 | 1008.7 |
| $a$        | 0     | 0.73   | 1.95   | 3.29  | 2.56   | 42.29  |
| $b$        | 1     | 1      | 1      | 6.84  | 5.84   | 50     |
| $T_{pot}$  | 0.12  | 0.14   | 0.15   | 0.17  | 0.03   | 0.75   |
| $T_{base}$ | 0.05  | 0.09   | 0.12   | 0.18  | 0.09   | 3      |

The drainage coefficient “ $a$ ” exhibits a median of 1.95 (IQR: 0.73–3.29), indicating relatively smooth storage discharge dynamics at a basin scale. The exponent parameter “ $b$ ” shows a median of 1.00 (IQR: 1.00–6.84), with some grid cells reaching the imposed parameter bounds. The prevalence of lower “ $b$ ” values suggests near linear drainage behavior for many regions, consistent with large-scale aggregated storage processes rather than highly nonlinear near-surface responses. The exponential filter parameters ( $T_{pot}$  and  $T_{base}$ ) display narrow interquartile ranges, indicating stable noise reduction behavior across grid cells. Overall, the calibrated parameter distributions demonstrate physically consistent behavior and support the applicability of the SM2RAIN framework to high-frequency TWS observations. The obtained parameter ranges are physically plausible and exhibit clear spatial variability across Europe, reflecting differences in climate regime and storage characteristics. Compared to typical SM2RAIN applications based on surface soil moisture, the calibrated  $Z^*$  “ values are generally larger, which is expected since terrestrial water storage integrates water variations over the full soil column and shallow subsurface rather than being limited to the near-surface layer. Similarly, the drainage-related parameters “ $b$ ” tends to reflect smoother and slower storage discharge dynamics, consistent with the deeper and more integrated nature of TWS compared to surface soil moisture. These differences do not indicate a change in the conceptual structure of SM2RAIN but rather reflect the different hydrological control exerted by TWS relative to surface soil moisture. We will add a short discussion of these parameter statistics and their interpretation to the revised manuscript as well as in the supplementary material.

RC1: While ERA5 provides groundwater and snow components, the authors calculate “TWS” only from soil moisture. This assumption may disqualify specific areas.

**ACs:** In this study, terrestrial water storage (TWS) was approximated using the four soil moisture layers available in ERA5L. We acknowledge that this representation does not explicitly include other storage components such as snow water equivalent, groundwater, surface water, or canopy interception, which are part of the total storage measured by GRACE and GRACE-FO. However, for the selected European domain in this study, the contribution of some of these components is relatively limited for the purposes of the present sensitivity experiments. In particular, the contributions of canopy interception and surface water storage are generally small at the spatial scale considered (100 km). Snow water equivalent may locally influence storage variability in northern and mountainous regions, but its contribution is comparatively limited across most of the study's domain during the analyzed period. Furthermore, groundwater storage is not explicitly represented in ERA5L and therefore cannot be included in the proxy dataset used for synthetic experiments. Since the goal of this study is to find out how possible and sensitive it is to estimate the precipitation under future gravity mission configurations. By isolating the soil moisture driven component of TWS, it allows for a clearer attribution between precipitation forcing and storage response. Nevertheless, we acknowledge that this simplification does not represent the full GRACE observed storage signal; future work will incorporate additional storage components when suitable datasets become available to assess their influence on precipitation retrieval and flux partitioning under realistic hydrological conditions.

RC1: SM2RAIN neglects runoff and evaporation, which can be reasonable for short events but for 15-30 days, this can be considerable. These parameters should also be considered.

**ACs:** The SM2RAIN framework estimates precipitation based on changes in storage, without directly modeling runoff and evapotranspiration (ET) as distinct fluxes. The aim of this study is to perform a controlled sensitivity analysis of precipitation retrieval across various NCGM/MAGIC sampling scenarios, utilizing a physically coherent ERA5L framework. This enables us to isolate the effects of temporal resolution and measurement uncertainty on precipitation estimation. We acknowledge, however, that neglecting explicit runoff and ET terms may introduce limitations at longer aggregation scales. Future work will extend the framework to include a flux consistent water balance approach that includes constraints on evapotranspiration and runoff. We will incorporate these suggestions into the “Limitations and Future Work” section of the revised manuscript.

RC1: Clarify why a Gaussian noise model was chosen, how noise is injected (independent per sample? temporally spatially correlated?) and precisely how temporal resampling is implemented (averaging/endpoints). Also, how this resample is coupled with the exponential filter step.

**ACs:** The Additive Gaussian noise introduced is a simplified error model. In reality, gravimetric mission errors may have spatial and temporal correlations, depend on orbital geometry of the mission, and be regionally dependent (e.g., topography), but the purpose of this noise model is to assess the sensitivity of the precipitation retrieval to measurement uncertainty. Thus, the Gaussian assumption must be understood as a linear approximation of the measurement uncertainty rather than the complete expected error structure of future gravity missions. Noise is generated using a normal distribution and is assumed to be temporally and spatially uncorrelated, providing a controlled baseline for sensitivity analysis. We acknowledge that real gravity mission errors may exhibit spatial or temporal correlation; however, the present study focuses on first-order sensitivity to error amplitude, and correlated error structures will be explored in future work. Temporal resampling is implemented using a moving average aggregation scheme. A fixed window (e.g., five samples for the 5-day scenario) is applied to both the TWS signal and its time axis. The smoothed values are then embedded between the first and last original observations to preserve endpoints, and the resulting series is linearly interpolated back to the original daily time grid. This ensures temporal alignment while emulating reduced mission sampling frequency. The exponential filter described by Brocca et al. (2019) is subsequently applied within the SM2RAIN framework to the resampled (and noise-perturbed) TWS signal. Therefore, the overall smoothing of the storage signal reflects both the moving average temporal aggregation and the

adaptive exponential filtering step prior to precipitation inversion. This processing sequence has now been clarified and will be incorporated in the revised manuscript.

RC1: Quantify performance stratified by Köppen–Geiger class and precipitation intensity, not only spatial maps. Relate weak regions (Alps, Baltics, coastal Norway) to process drivers (snowpack, orography, deep storage).

ACs: As per reviewer suggestion, we extended the analysis by stratifying model performance according to Köppen–Geiger climate classes and precipitation intensity by utilizing ERA5L reference precipitation as demonstrated in Table 2 and Table 3 (summarized below and will be incorporated in the revised manuscript).

**Table 2.** Performance of SM2RAIN derived precipitation estimates stratified by Köppen Geiger climate classes across the study domain. The table reports the number of grid cells (N), the mean correlation coefficient (R) between SM2RAIN-derived and ERA5L reference precipitation, and the corresponding root mean square error (RMSE) for 15D and 30D precipitation. Grid cells were assigned to climate classes using the Köppen–Geiger classification map. This stratification highlights the influence of regional hydroclimatic conditions on the relationship between terrestrial water storage variations and precipitation.

| Class      | N   | R_mean_15D | R_mean_30D | RMSE_mean_15D | RMSE_mean_30D |
|------------|-----|------------|------------|---------------|---------------|
| <b>B</b>   | 137 | 0.786      | 0.792      | 18.505        | 29.227        |
| <b>Csa</b> | 241 | 0.972      | 0.976      | 6.544         | 10.162        |
| <b>Csb</b> | 172 | 0.958      | 0.959      | 9.039         | 14.459        |
| <b>Cfb</b> | 50  | 0.950      | 0.940      | 9.757         | 16.246        |
| <b>Dfb</b> | 200 | 0.785      | 0.773      | 15.693        | 24.854        |
| <b>Dfc</b> | 144 | 0.847      | 0.846      | 14.856        | 22.756        |
| <b>ET</b>  | 142 | 0.868      | 0.857      | 13.626        | 21.835        |

For each climate class, we computed the mean correlation coefficient (R) and root mean square error (RMSE) across all grid cells belonging to that class. The results indicate that the highest performance is achieved in Mediterranean climates (Csa and Csb), where mean correlations exceed 0.95. These regions are dominated by rainfall-driven hydrological processes, allowing terrestrial water storage variations to respond more directly to precipitation inputs. Similarly, high performance is observed in oceanic climates (Cfb). In contrast, lower performance is observed in colder continental climates (Dfb) and arid regions (B), where mean correlations decrease to approximately 0.78. In cold regions, seasonal snow accumulation and freeze-thaw processes can delay the storage response to precipitation, weakening the relationship assumed by the SM2RAIN inversion. In mountainous regions such as the Alps and northern areas including the Baltics and coastal Norway, complex topography and snowpack dynamics further weaken the relationship between precipitation and TWS variations.

To further investigate the sensitivity of the method to rainfall magnitude, model performance was stratified by precipitation intensity using ERA5L reference precipitation (Table 3). The results indicate a strong dependence of performance on rainfall intensity. For very light precipitation events ( $0\text{--}2\text{ mm day}^{-1}$ ), the correlation between SM2RAIN-derived precipitation and the reference dataset is relatively low ( $R = 0.13$ ), reflecting the limited detectability of small storage variations in terrestrial water storage signals. Performance improves progressively with increasing precipitation intensity, reaching  $R = 0.46$  for events between  $5\text{ and }10\text{ mm day}^{-1}$  and  $R = 0.77$  for heavy precipitation events exceeding  $10\text{ mm day}^{-1}$ . This behavior is consistent with the physical nature of gravimetric observations, which capture integrated water storage changes and therefore respond more clearly to large rainfall inputs than to weak precipitation events. The increase in RMSE with precipitation intensity reflects the larger absolute magnitude of precipitation amounts rather than a deterioration of relative performance. This reflects the physical

nature of gravimetric observations, which are more sensitive to large storage changes associated with strong rainfall events, while weak precipitation signals can be masked by evaporation and measurement noise.

**Table 3.** Performance of SM2RAIN-derived precipitation estimates stratified by precipitation intensity using ERA5L reference precipitation. The table reports the number of samples (N), correlation coefficient (R), root mean square error (RMSE), and the mean reference precipitation within each intensity bin. Precipitation events were grouped into four intensity categories (0–2, 2–5, 5–10, and >10 mm day<sup>-1</sup>). This analysis evaluates the sensitivity of precipitation estimation from terrestrial water storage signals to rainfall magnitude.

| Intensity Bin | R     | RMSE  | Mean Pobs | Interpretation     |
|---------------|-------|-------|-----------|--------------------|
| 0-2 mm/day    | 0.133 | 1.281 | 0.336     | Very weak signal   |
| 2-5 mm/day    | 0.311 | 2.746 | 3.283     | Slight improvement |
| 5-10 mm/day   | 0.457 | 3.233 | 7.069     | Moderate skill     |
| >10 mm/day    | 0.774 | 6.099 | 16.871    | Strong skill       |

RC11: Compare your model’s performance with prior SM2RAIN studies (SM-based) and related inversions. Also, justify the choice of  $R \geq 0.7$  as “satisfactory” (literature or application-driven).

**Authors:** We thank the reviewer for this important suggestion. A direct comparison between precipitation estimates derived from SM and TWS within the SM2RAIN framework is indeed very relevant. However, such a comparison requires a dedicated experimental design including consistent datasets, calibration strategies, and validation using real world observations; this is beyond the scope of this work, which aims to evaluate the feasibility of precipitation estimation from TWS and the sensitivity of the approach to the anticipated sampling and the accuracy characteristics of future gravity missions. A systematic comparison between SM based and TWS-based SM2RAIN approaches is therefore planned as part of future work using observational datasets. Regarding the second point, the threshold  $R \geq 0.7$  was used as an indicative benchmark of satisfactory performance based on previous SM2RAIN applications and satellite precipitation validation studies. As an example, global precipitation products derived using the SM2RAIN approach typically report correlations in the range 0.6–0.8 (e.g. with respect to reference precipitation datasets), which is deemed acceptable given the indirect nature of the inversion and uncertainties in the satellite observations. Brocca et al. (2019) reported similar performances in the global SM2RAIN precipitation dataset, where correlations above 0.7 were found to be representative of good precipitation retrievals. Our results suggest that TWS variations contain sufficient hydrological information to retrieve precipitation signals and that the TWS-based inversion approach could serve as a useful complement to soil-moisture-based precipitation estimation. We will also add this explanation to the revised manuscript.

RC1: Study limitations are missing.

**ACs:** Limitations and future work for this work are explained already explained above and will be incorporated into the revised manuscript as a separate section 4.

RC1: It is suggested to incorporate discussion with results rather than conclusions to compare your results with prior studies and justify the results.

**ACs:** We thank the reviewer for this suggestion. We will revise the manuscript by integrating comparison with prior SM2RAIN and gravity-based studies directly within the results and discussion sections, rather than limiting such comparisons to the conclusions. Further, the present work is intended as a preliminary proof of concept, i.e., a synthetic

study designed to assess the potential of high resolution TWS observations from future gravity missions for precipitation retrieval. As such, the scope of available comparisons is limited to methodological and conceptual consistency with previous SM2RAIN and large scale hydrological applications, rather than full operational validation.

### Editorial comments

RC1: Tighten the abstract starting with motivation and the specific temporal scales actually evaluated (15/30-day), state the calibration/reference clearly and report core numbers with uncertainty. (Minor but in abstract  $R=0.86$  is mentioned as daily, which I think is typo).

ACs: The abstract is revised considering reviewer suggestions and will be incorporated in the revised version. Regarding the reported value of  $R = 0.86$ , this is not a typo error. The correlation coefficient of 0.86 corresponds to the daily resolution computation within the synthetic framework. Precipitation was first estimated at daily resolution using SM2RAIN to check model performance, followed by aggregation to 15 and 30 day scales for comparative analysis and clearer visualization of performance (as presented in Figure 2 in the main manuscript).

RC1: Expand the mission context in the introduction with a concise paragraph of NGGM/MAGIC specs (sampling cadence, effective resolution, target/threshold errors, current program status) and cite appropriately.

ACs: The introduction has been revised by summarizing the key characteristics of the NGGM/MAGIC mission framework, including the intended temporal sampling (approximately sub-weekly), effective spatial resolution (approximately 100 km), and target equivalent water height accuracy (~5–10 mm at regional scales), as well as threshold performance considerations. We also clarified the current program status, noting that NGGM is progressing through ESA's mission definition and Phase A extension activities under the Future Earth Observation program. Appropriate references (Daras et al., 2023, 2024; Haagmans and Tsaoussi, 2020) have been added to support the mission specifications.

Within this framework, the European Next-Generation Gravity Mission (NGGM), coordinated with the NASA led GRACE-C component, is designed to drastically improve both the temporal sampling and effective spatial resolution of observations of terrestrial water storage relative to the GRACE and GRACE-FO missions. Current mission studies indicate a target temporal sampling on the order of sub-weekly days and an effective spatial resolution approaching approximately 100 km at regional scales, for equivalent water height accuracies of approximately 5–10 mm under target performance conditions. Together with further improvements in orbit and attitude modelling, these will enable the generation of fast-track gravity products on sub-weekly time-scales, with reduced temporal aliasing and enhanced signal-to-noise characteristics. NGGM is currently progressing through mission definition activities (Phase A extension) funded under ESA's Future Earth Observation. This addition strengthens the contextualization of the study and more clearly links the synthetic experiment design to the expected capabilities of next-generation gravity missions.

RC1: Add a short subsection "Evaluation framework" that upfront defines metrics (R, RMSE, bias, NS), aggregation windows, references used, comparisons performed (feasibility vs synthetic NGGM/MAGIC vs GRACE-FO-like), and the criteria for "satisfactory".

ACs: We thank the reviewer for this suggestion. The information describing the evaluation metrics, aggregation windows, reference dataset, and comparison experiments was already included in Sections 2.2–2.4. To improve clarity, we made a new Section 2.5 summarizing the evaluation framework, including the performance metrics (R, RMSE, bias, and Nash–Sutcliffe efficiency), the aggregation windows (15D and 30D), the reference dataset (ERA5-Land), and the types of experiments performed (feasibility tests, synthetic NGGM/MAGIC configurations, and GRACE/GRACE-FO-like scenarios).

### 2.5 Evaluation framework

The Nash–Sutcliffe efficiency (NS) index was used as the objective function for parameter calibration and as a principal metric for model performance assessment, together with bias (mm), correlation coefficient (R) and root mean square error (RMSE). These complementary metrics were used to evaluate the precipitation estimates. The study considered three type of experiments: i) feasibility experiments, in which ~~we used~~ ERA5L based TWS ~~were~~ used as a proxy for perfect storage retrievals and to evaluate the capability of SM2RAIN to reconstruct precipitation from storage variations; ii) synthetic experiments simulating the expected sampling and error characteristics of NNGM/MAGIC missions, iii) reference scenarios, which represent GRACE/GRACE-FO-like temporal sampling conditions. Precipitation was first estimated at daily resolution during feasibility stage using SM2RAIN to check model performance followed by aggregation to 15 and 30 day scales for comparative analysis and clearer visualization of performance. In a second stage, synthetic experiments were conducted by resampling daily TWS time series to 5-day intervals serving as a proxy of NNGM/MAGIC missions which will provide such temporal resolution followed by aggregation to 15 day scales for clearer visualization of performance.

RC1: Split Figure 1 into 1a (domain) and 1b (Köppen–Geiger); improve the caption accordingly and ensure all figures state grid characteristics (masking, number of time steps per pixel).

ACs: We thank the reviewer for the suggestion. Figure 1 has been revised to clearly distinguish two panels: Figure 3a shows the study domain, and Figure 3b presents the Köppen–Geiger climate classification used in the analysis. The caption has been improved and extended to describe the grid characteristics of the analysis, including the spatial resolution (100 km) and the temporal coverage (2003–2012).

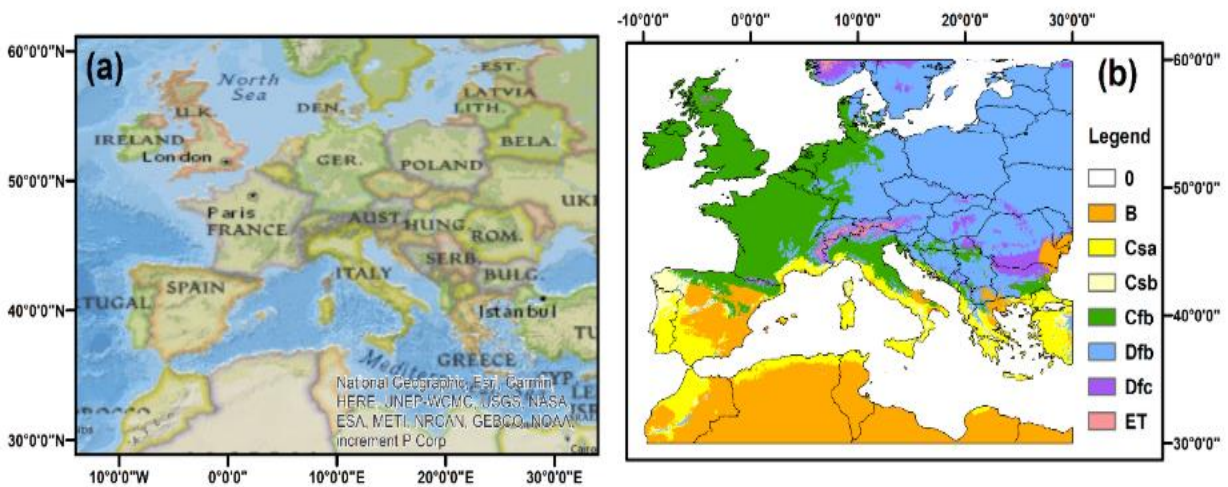

**Figure 3. (a)** Study domain covering the European region used in this analysis. The spatial grid corresponds to the ERA5L dataset resampled to approximately 100 km spatial resolution. The analysis period spans 2003–2012, corresponding to 3653 daily time steps used in the SM2RAIN experiments. The base map is derived from OpenStreetMap data © OpenStreetMap contributors (available under the Open Database License). **Figure 1. (b)** Köppen–Geiger climate classification across the study domain used to assess the influence of climatic conditions on the performance of precipitation estimation from terrestrial water storage signals. The major climate classes include arid (B), Mediterranean climates (Csa, Csb), temperate oceanic climates (Cfb), cold continental climates (Dfb, Dfc), and tundra climates (ET).

RC1: Describe how the 100 random points and the eight countries were selected (random seed, spatial/climatic stratification) to ensure it cover everything.

**ACs:** The set of 100 grid cells was selected by randomly sampling from all valid land pixels within the study domain that contained complete TWS and precipitation records (i.e., no missing values). To ensure reproducibility of the sampling procedure, the random selection was performed using a fixed random seed as shown in Fig. 4.

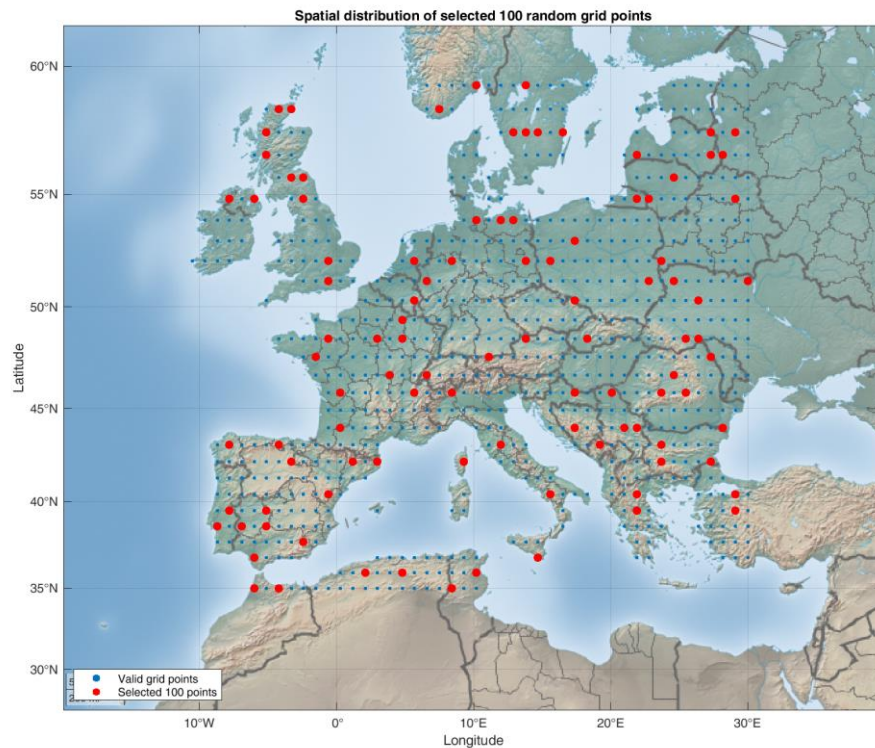

Figure 4 Spatial distribution of the 100 randomly selected grid points (red) used in the sensitivity analysis, overlaid on all valid grid cells (blue) across Europe. Sampling was performed using a fixed random seed to ensure reproducibility.

The purpose of this experiment was to provide a representative sensitivity analysis to evaluate the impact of temporal aggregation and measurement error on precipitation estimation using SM2RAIN. Therefore, no explicit climatic or spatial stratification was imposed in this step. The eight countries shown in the regional analysis were selected intentionally to provide broad geographic and hydro climatic coverage across Europe, including southern, central, northern, and eastern regions, and to represent contrasting environments such as Mediterranean, temperate, continental, and colder climates. They were therefore used as illustrative regional examples rather than as a statistically stratified sample of all European conditions. To improve transparency and demonstrate the spatial representativeness of the random sampling, we will also include Fig.4 as a supplementary figure in the revised manuscript showing the spatial distribution of the selected 100 grid points across the study domain.

RC1: Clarify the GRACE-FO-like benchmark ( $\approx 30$ -day cadence,  $\approx 25$  mm error) as a synthetic reference rather than a run driven by actual GRACE fields and keep these numbers together wherever it appears.

**ACs:** In this study, we used terrestrial water storage (TWS) from ERA5-Land as a proxy dataset. We did not use real GRACE or GRACE-FO observations in our analysis. Rather, we used a proxy data set and degraded its temporal sampling and measurement errors to mimic different mission configurations, in which the GRACE-FO-like configuration serves as a synthetic benchmark that approximates the nominal sampling of current satellite gravimetry missions. The measurement error levels used in the synthetic experiments are derived from the ESA Next-Generation Gravity Mission (NGGM) Mission Requirements Document (MRD), which specifies expected uncertainty levels for

different spatial and temporal scales of future gravity observations (ESA, 2023). Based on these specifications, we defined a reference configuration representing present-day gravimetry capability with approximately 30-day temporal sampling and ~25 mm equivalent water height uncertainty, which we refer to as a GRACE-FO-like synthetic benchmark. This configuration serves only as a reference scenario to evaluate the potential improvements achievable with future missions such as NGGM and MAGIC. To avoid ambiguity, the manuscript will be revised to explicitly state that this benchmark is synthetic and not derived from actual GRACE observations, and the values describing the configuration (30-day cadence and ~25 mm error) are now consistently reported together wherever the GRACE-FO-like configuration is mentioned.

RC1: Prefer quantitative phrasing in conclusions (e.g., deltas in R/RMSE relative to the GRACE-FO-like case under  $\leq 10$  mm error and 5-day sampling) and answer the stated research questions directly.

ACs: We thank the reviewer for this suggestion. In the revised manuscript, the conclusions section will be revised by incorporating more quantitative statements: "The verification of SM2RAIN leads to design NGGM/MAGIC configurations which clearly show how temporal resolution and error levels have an impact on the performance for precipitation estimation. The results indicate a high correlation range (0.88-0.61) and lower RMSE (5mm - 42 mm) with shorter temporal aggregation (5-days) compared to longer windows (e.g., 30-day sampling representative of GRACE-FO-like conditions 30-days), even when errors (0-20 mm) are added." describing the performance differences between the GRACE-FO-like configuration and the NGGM/MAGIC-like configurations characterized by higher temporal sampling and lower measurement uncertainty.

## Reference

Brocca, L., Filippucci, P., Hahn, S., Ciabatta, L., Massari, C., Camici, S., Schüller, L., Bojkov, B. and Wagner, W., 2019. SM2RAIN–ASCAT (2007–2018): Global daily satellite rainfall data from ASCAT soil moisture observations. *Earth System Science Data*, 11(4), 1583-1601.

Daras, I., March, G., Pail, R., Hughes, C., Braitenberg, C., Güntner, A., Eicker, A., Wouters, B., Heller-Kaikov, B., and Pivetta, T.: Level-2a simulated gravity field solutions of ESA's science support study to Mass change And Geosciences International Constellation (MAGIC) Phase AV 1.0., <https://doi.org/10.5880/icgem.2023.005>, 2023.

Daras, I., March, G., Pail, R., Hughes, C. W., Braitenberg, C., Güntner, A., Eicker, A., Wouters, B., Heller-Kaikov, B., and Pivetta, T.: Mass-change And Geosciences International Constellation (MAGIC) expected impact on science and applications, *Geophys J Int*, 236, 1288–1308, <https://doi.org/10.1093/gji/ggad472>, 2024.

ESA (2023). Next-Generation Gravity Mission (NGGM) Mission Requirements Document (MRD), Version 1.0. European Space Agency, Future Earth Observation Programme.

Haagmans, R. and Tsaoussi, L.: Next Generation Gravity Mission as a Mass-change And Geosciences International Constellation (MAGIC) Mission Requirements Document, Earth and Mission Science Division, European Space Agency, <https://doi.org/10.5270/esa.nasa.magic-mrd.2020>, 2020.

Knoben, W.J., Freer, J.E. and Woods, R.A., 2019. Inherent benchmark or not? Comparing Nash–Sutcliffe and Kling–Gupta efficiency scores. *Hydrology and Earth System Sciences*, 23(10), pp. 4323–4331.

Nash, J.E. and Sutcliffe, J.V., 1970. River flow forecasting through conceptual models part I—A discussion of principles. *Journal of hydrology*, 10(3), pp.282–290.

Williams, G.P., 2025. Friends Don't Let Friends use Nash-Sutcliffe Efficiency (NSE) or KGE for Hydrologic Model Accuracy Evaluation: A rant with data and suggestions for better practice. *Environmental Modelling & Software*, p. 106665.

Zhong, Y., Tian, B., Kim, H., Yuan, X., Liu, X., Zhu, E., Wu, Y., Wang, L. and Wang, L., 2025. Over 60% precipitation transformed into terrestrial water storage in global river basins from 2002 to 2021. *Communications Earth & Environment*, 6(1), p.53.
